# Supplementary material for: Study of Volatile Organic Compounds of Two Table Grapes (cv. Italia and Bronx Seedless) along Ripening in Vines Established in the Aegean Region (Turkey)
Source: MDPI journal article supplement (doi:10.3390/plants11151935), 2022-07-26
Supplement: s1 [file s1]

### Supplementary material

**Table S1.** Concentration of neral ( $\mu\text{g L}^{-1}$ ) of the interaction between variety (V) and phenological stage (S) factors.

| Interaction            | Neral              |
|------------------------|--------------------|
| Bronx Seedless BBCH-77 | $0.60 \pm 0.02$ a  |
| Bronx Seedless BBCH-79 | $0.66 \pm 0.02$ ab |
| Bronx Seedless BBCH-81 | $0.74 \pm 0.02$ bc |
| Bronx Seedless BBCH-83 | $0.82 \pm 0.03$ cd |
| Bronx Seedless BBCH-85 | $0.91 \pm 0.03$ de |
| Italia BBCH-77         | $0.95 \pm 0.06$ ef |
| Bronx Seedless BBCH-89 | $1.01 \pm 0.03$ ef |
| Italia BBCH-79         | $1.05 \pm 0.07$ f  |
| Italia BBCH-81         | $1.17 \pm 0.08$ g  |
| Italia BBCH-83         | $1.30 \pm 0.09$ h  |
| Italia BBCH-85         | $1.45 \pm 0.10$ i  |
| Italia BBCH-89         | $1.61 \pm 0.11$ j  |

Data are expressed as mean of the data. <sup>a</sup>Significance ( $p$ -value) of variety (V), phenological stage (S), and V  $\times$  S interactions. Different letters within a column represent significant differences (Duncan test,  $p < 0.05$ ).
